# Supplementary material for: Efficient Synthesis of Isoamyl Acetate Using a Thermostable Geobacillus kaustophilus Lipase Immobilized in TPP-Crosslinked ZIF-8
Source: Research Square preprint supplement (doi:10.21203/rs.3.rs-8733888/v1), 2026-02-04
Supplement: Supplementary file 1 [file 88974a9ce8735dee9b2a912a.docx]

**Supplementary file**

**Efficient Synthesis of Isoamyl Acetate Using a Thermostable *Geobacillus kaustophilus* Lipase Immobilized in TPP-Crosslinked ZIF-8**

Murat Türk*

Cukurova University, Ceyhan Vocational School, 01330, Adana, Turkey

*Corresponding author: e-mail: murturk@cu.edu.tr

**Table S1.** Summarization of purification process of *Gk*L.

| Purification step | Volume  (mL) | Total  protein (mg) | Total  activity  (U) | Specific  activity  (U/mg protein) | Purification  (fold) | Activity  yield (%) |
| --- | --- | --- | --- | --- | --- | --- |
| Cell free | 10.0 | 26.8 | 1786.3 | 66.7 | 1.0 | 100 |
| Ni2+-NTA | 6 | 4.6 | 813.2 | 176.8 | 2.7 | 45.5 |
| Concentrated protein | 2.5 | 2.3 | 437.6 | 190.3 | 2.9 | 24.5 |


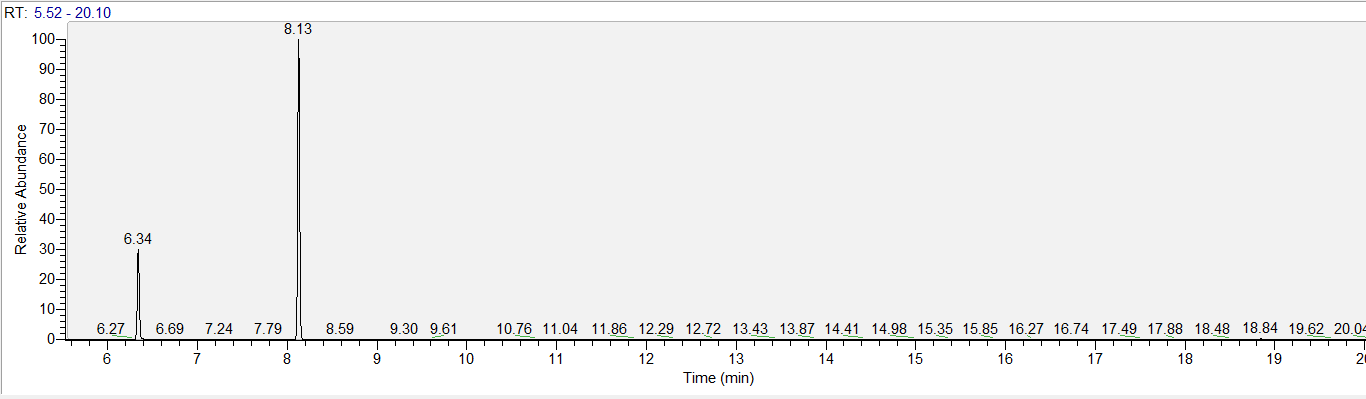


**Fig. S1.** The retention times of isoamyl alcohol (6.34 min) and isoamyl acetate (8.13 min).


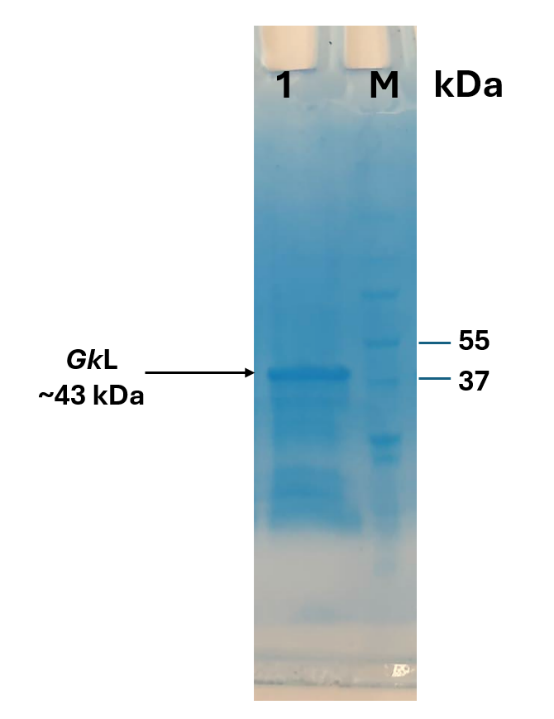


**Fig. S2.** SDS PAGE profile of the concentrated *Gk*L. Lane 1 shows the *Gk*L sample after ultrafiltration, exhibiting a distinct band at approximately 45 kDa. Lane M corresponds to the molecular weight marker (BioRad All Blue Protein Standards, catalog no. 161-0373).
